# Supplementary material for: An Inhibitory Antibody Blocks Interactions between Components of the Malarial Invasion Machinery
Source: PLoS Pathog. 2009 Jan 23;5(1):e1000273. doi: 10.1371/journal.ppat.1000273 (PMC2621342; doi:10.1371/journal.ppat.1000273)

**Supplementary Figure S1: Mutations within and flanking the hydrophobic trough of PfAMA1 do not disrupt the overall conformation of the molecule.**

Western blot of immunoprecipitates from extracts of transgenic parasite lines expressing hydrophobic trough mutants of PfAMA1/DIII-HA. IPs were performed with mAb 4G2 and the Westerns were probed with either polyclonal antibody R5 (to detect both endogenous and transgene-derived PfAMA1), or the anti-HA mAb 3F10 (to detect transgene-derived PfAMA1 only). The results confirm that all the hydrophobic trough mutants except PfAMA1/DIII-HA- $\Delta$ H1 and - $\Delta$ H1+2 were able to interact with mAb 4G2.

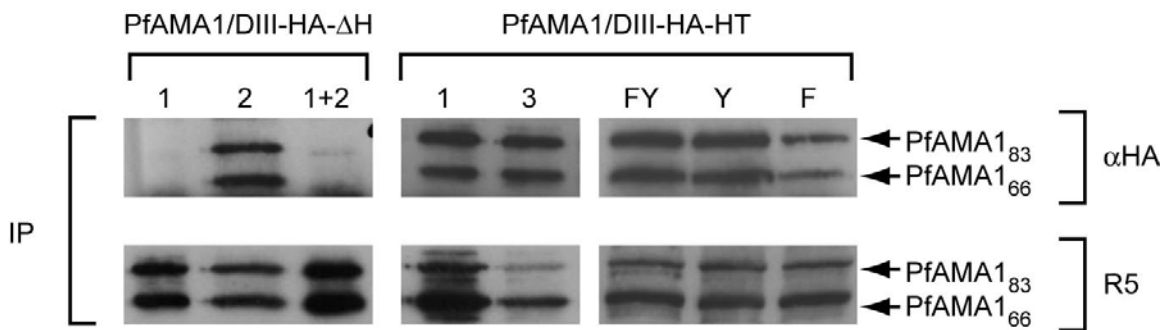

Supplement: Figure S1 — Mutations within and flanking the hydrophobic trough of PfAMA1 do not disrupt the overall conformation of the molecule (0.19 MB PDF) [file ppat.1000273.s001.pdf]
