# Supplementary material for: An Inhibitory Antibody Blocks Interactions between Components of the Malarial Invasion Machinery
Source: PubMed Central journal article supplement (PMC2621342; doi:10.1371/journal.ppat.1000273), 2009-01-23
Supplement: ppat.1000273.s002.pdf [file ppat.1000273.s002.pdf]

**Supplementary Table S1:** Peptides identified by MALDI-TOF analysis of PfRON4 tryptic digests

| Peptide sequence                       | Residue numbers | Calculated m/z | Observed m/z | Error +/- ppm |
|----------------------------------------|-----------------|----------------|--------------|---------------|
| KLGVSYSR                               | 2695 - 2702     | 908.508        | 909.529      | 14.7          |
| FYETLGIK                               | 2670 - 2677     | 969.517        | 970.507      | -18.7         |
| GLHVSLRER                              | 2585 - 2593     | 1065.604       | 1066.612     | -0.1          |
| LALVPPFQGIK                            | 2386 - 2395     | 1084.664       | 1085.655     | -15.6         |
| NMNNNHAAQR                             | 2541 - 2549     | 1097.478       | 1098.509     | 20.3          |
| NMNNNHAAQR (Met oxidised)              | 2541 - 2549     | 1113.473       | 1114.487     | 5.7           |
| IIIEIMESAK                             | 2594 - 2603     | 1145.637       | 1146.658     | 12.2          |
| MVLQYLVLHK                             | 2934 - 2943     | 1242.716       | 1243.745     | 17.6          |
| HMVGEHVPPQK                            | 2462 - 2472     | 1257.629       | 1258.661     | 19.5          |
| HMVGEHVPPQK (Met oxidised)             | 2462 - 2472     | 1273.624       | 1274.668     | 28.7          |
| INSYFHYTEK                             | 2874 - 2883     | 1300.609       | 1301.650     | 26.0          |
| DSGKLFMEALEK                           | 2617 - 2628     | 1366.680       | 1367.725     | 27.1          |
| VSSVPFNYENVK                           | 2834 - 2845     | 1381.688       | 1382.725     | 21.3          |
| ERIIIEIMESAK                           | 2592 - 2603     | 1430.780       | 1431.836     | 33.2          |
| CAIKDIIISISSK                          | 2714 - 2726     | 1446.812       | 1447.843     | 16.2          |
| KPSSSIIGSLGNLIK                        | 2846 - 2860     | 1512.887       | 1513.929     | 22.0          |
| YSQNKDYVETLEK                          | 2802 - 2814     | 1615.773       | 1616.792     | 6.9           |
| DHAYLGLIDELLVMNK (Met oxidised)        | 2785 - 2800     | 1858.950       | 1859.912     | -24.3         |
| IISVCTLLHLTDMLYK                       | 2893 - 2908     | 1919.026       | 1920.034     | 0.1           |
| IISVCTLLHLTDMLYK (Met oxidised)        | 2893 - 2908     | 1935.021       | 1936.020     | -4.5          |
| ILTEMSFYEDSKFYETLGIK                   | 2658 - 2677     | 2413.176       | 2414.187     | 1.4           |
| EGPIITPLEGEQAGTAHKEDVTHK               | 2438 - 2461     | 2556.282       | 2557.290     | 0.1           |
| KMIANNNDNYTCSVYQNSNCSNK (Met oxidised) | 1329 - 1350     | 2640.100       | 2641.175     | 25.4          |
| NTEENKIEEQYNNINHHSHDINK                | 2008 - 2030     | 2819.286       | 2820.245     | -17.3         |
