# Supplementary material for: An Inhibitory Antibody Blocks Interactions between Components of the Malarial Invasion Machinery
Source: PubMed Central journal article supplement (PMC2621342; doi:10.1371/journal.ppat.1000273), 2009-01-23
Supplement: ppat.1000273.s003.pdf [file ppat.1000273.s003.pdf]

**Supplementary Table S2:** Peptides identified by MALDI-TOF analysis of PfRON2 tryptic digests

| Peptide sequence                   | Residue numbers | Calculate d m/z | Observe d m/z | Error +/- ppm |
|------------------------------------|-----------------|-----------------|---------------|---------------|
| EPFGVAR                            | 1833 - 1839     | 774.402         | 775.382       | -36.8         |
| KAFDLLR                            | 1290 - 1296     | 861.507         | 862.472       | -49.8         |
| GFEEYKR                            | 1622 - 1628     | 927.445         | 928.420       | -35.8         |
| TTTTFYGER                          | 1192 - 1199     | 973.450         | 974.422       | -37.1         |
| ELIYGDIR                           | 1338 - 1345     | 977.518         | 978.482       | -45.0         |
| DIGPNKSER                          | 408 - 416       | 1014.509        | 1015.483      | -33.9         |
| SYVDVYGR                           | 417 - 424       | 1021.450        | 1022.425      | -32.4         |
| YASPTYDPK                          | 36 - 44         | 1040.481        | 1041.569      | 76.6          |
| DGYLSESER                          | 823 - 831       | 1054.457        | 1055.496      | 29.8          |
| NPNIFPGSPR                         | 551 - 560       | 1097.562        | 1098.532      | -34.0         |
| YIYNDFMK (Met oxidised)            | 1357 - 1364     | 1108.490        | 1109.466      | -28.8         |
| YAELSHENR                          | 1850 - 1858     | 1117.515        | 1118.501      | -19.8         |
| HNFSQYDSK                          | 1586 - 1594     | 1124.489        | 1125.463      | -30.1         |
| YTLWYEPR                           | 1330 - 1337     | 1126.545        | 1127.534      | -16.7         |
| LQDLQLEER                          | 1664 - 1672     | 1142.593        | 1143.564      | -32.1         |
| ILSLGNMLLR (Met oxidised)          | 1758 - 1767     | 1144.664        | 1145.630      | -36.5         |
| YTLWYEPR (Trp oxidised)            | 1330 - 1337     | 1158.535        | 1159.527      | -13.3         |
| GSYHYISYAK                         | 2177 - 2186     | 1187.561        | 1188.552      | -14.4         |
| VQFLNSTSSIR                        | 1409 - 1419     | 1250.662        | 1251.683      | 10.3          |
| FANSTSMILPHK (Met oxidised)        | 1511 - 1522     | 1360.681        | 1361.689      | 0.6           |
| IDDKDFVHNFK                        | 1908 - 1918     | 1376.672        | 1377.671      | -6.5          |
| GNYIENINNIAR                       | 1460 - 1471     | 1389.700        | 1390.726      | 12.7          |
| LQDLQLEEREK                        | 1664 - 1674     | 1399.731        | 1400.756      | 12.3          |
| SFLPSNEIELEK                       | 936 - 947       | 1404.714        | 1405.702      | -13.9         |
| DITFIPIESRPK                       | 1179 - 1190     | 1414.782        | 1415.807      | 12.0          |
| WDQFINKELVR                        | 1689 - 1699     | 1446.762        | 1447.793      | 16.1          |
| DIGAGPVASCFTTR                     | 2028 - 2041     | 1450.687        | 1451.713      | 12.4          |
| CEFEESLYNPK                        | 1262 - 1273     | 1501.639        | 1502.639      | -5.7          |
| EYDDNKYPYNYK                       | 425 - 436       | 1561.668        | 1562.694      | 11.1          |
| IGDYLNISFEYSR                      | 970 - 982       | 1575.757        | 1576.773      | 5.1           |
| VEHALWFGATIDIKK (Trp oxidised)     | 1773 - 1787     | 1758.930        | 1759.898      | -22.6         |
| HLENNIDNNIIFSR                     | 1727 - 1741     | 1810.933        | 1811.904      | -20.1         |
| LYYNSLALGELVEPIR                   | 1077 - 1092     | 1848.998        | 1849.963      | -23.6         |
| LLQHIPAHMLENITSSIR                 | 1548 - 1565     | 2072.120        | 2073.047      | -39.2         |
| LLQHIPAHMLENITSSIR (Met oxidised)  | 1548 - 1565     | 2088.115        | 2089.059      | -30.6         |
| EYLCHLNVNPPGKPLER                  | 1059 - 1076     | 2186.094        | 2187.006      | -43.8         |
| HLTNNTDDTILHMIENAEK (Met oxidised) | 1000 - 1018     | 2224.043        | 2224.970      | -36.1         |
| ENSLLFNQSDKWDQFINK (Trp oxidised)  | 1678 - 1695     | 2257.065        | 2257.970      | -45.4         |
| GTYGNNETPYVVEHPEYDNGK              | 498 - 518       | 2446.035        | 2446.927      | -47.1         |
| VVEDSKHLENNIDNNIIFSR               | 1721 - 1741     | 2468.266        | 2469.136      | -55.9         |
| VNINITNNGTHGNPHNNNSYGHK            | 257 - 279       | 2515.170        | 2516.053      | -49.7         |
| ILKEYLCHLNVNPPGKPLER               | 1056 - 1076     | 2540.357        | 2541.211      | -60.6         |
| GTKVIFYMPGNEQGVIPNNIQNK            | 46 - 68         | 2560.311        | 2561.053      | -103.8        |
| NQDNNSNKYNNQNGGYESDGNSPNSR         | 230 - 256       | 3015.221        | 3015.926      | -100.6        |
