# Supplementary material for: An Inhibitory Antibody Blocks Interactions between Components of the Malarial Invasion Machinery
Source: PubMed Central journal article supplement (PMC2621342; doi:10.1371/journal.ppat.1000273), 2009-01-23
Supplement: ppat.1000273.s004.pdf [file ppat.1000273.s004.pdf]

**Supplementary Table S3:** Peptides identified by MALDI-TOF analysis of Mal8P1.73 tryptic digests

| Peptide sequence                   | Residue numbers | Calculated m/z | Observed m/z | Error +/- ppm |
|------------------------------------|-----------------|----------------|--------------|---------------|
| LLGLISR                            | 775 - 781       | 770.501        | 771.484      | -32.4         |
| NVGFLLR                            | 552 - 558       | 817.481        | 818.458      | -37.2         |
| CDHFNR                             | 823 - 828       | 847.339        | 848.309      | -45.4         |
| WFNYNK                             | 559 - 564       | 870.402        | 871.334      | -88.1         |
| IIMQIIR                            | 650 - 656       | 885.547        | 886.507      | -53.7         |
| IIMQIIR (Met oxidised)             | 650 - 656       | 901.542        | 902.483      | -73.5         |
| NMGLEHER                           | 1094 - 1101     | 984.445        | 985.390      | -63.0         |
| IAPFNFFR                           | 472 - 479       | 1010.534       | 1011.481     | -60.0         |
| LLMYYYR                            | 396 - 402       | 1020.510       | 1021.455     | -61.5         |
| LLMYYYR (Met oxidised)             | 396 - 402       | 1036.505       | 1037.434     | -76.4         |
| TQISLFIHK                          | 928 - 936       | 1085.623       | 1086.551     | -73.9         |
| CKPTKISIR                          | 783 - 791       | 1101.633       | 1102.608     | -29.5         |
| GIGNEIVHTR                         | 1204 - 1214     | 1207.667       | 1208.632     | -35.9         |
| NKINYEIVFK                         | 840 - 849       | 1266.697       | 1267.632     | -57.8         |
| IVLGCIHDIYGGGR                     | 759 - 770       | 1358.676       | 1359.660     | -17.7         |
| GLDDSLYTFKSK                       | 333 - 344       | 1372.687       | 1373.644     | -37.5         |
| GIGNEIVHTRIP                       | 1204 - 1216     | 1417.804       | 1418.779     | -23.1         |
| NVDSIDVMFEPR                       | 58 - 69         | 1420.666       | 1421.642     | -22.3         |
| NVDSIDVMFEPR (Met oxidised)        | 58 - 69         | 1436.660       | 1437.625     | -29.8         |
| LMSSLNDPVDILR                      | 802 - 814       | 1471.770       | 1472.745     | -22.5         |
| ESLATMHSLDIIR                      | 147 - 159       | 1484.766       | 1485.744     | -20.1         |
| LMSSLNDPVDILR (Met oxidised)       | 802 - 814       | 1487.765       | 1488.728     | -30.0         |
| TGNESIFAIDDIK                      | 486 - 499       | 1534.788       | 1535.738     | -37.3         |
| ELERTQISLFIHK                      | 924 - 936       | 1612.894       | 1613.840     | -38.1         |
| IVLGCIHDIYGGREK                    | 759 - 772       | 1615.814       | 1616.781     | -25.0         |
| TDKIVLGCIHDIYGGGR                  | 756 - 770       | 1702.846       | 1703.777     | -45.0         |
| IAPFNFFREETQEK                     | 472 - 485       | 1754.863       | 1755.789     | -46.5         |
| QLDSQDISSLNFKR                     | 126 - 140       | 1763.880       | 1764.803     | -48.3         |
| FFENIKNEMINMSSK                    | 108 - 122       | 1830.864       | 1831.775     | -53.0         |
| NYNDLVNFSEVDYLLR                   | 625 - 640       | 1972.953       | 1973.863     | -49.7         |
| ASEVLKESLATMHSLDIIR                | 141 - 159       | 2112.125       | 2113.003     | -61.5         |
| ASEVLKESLATMHSLDIIR (Met oxidised) | 141 - 159       | 2128.120       | 2129.019     | -50.9         |
| HLPSDVNGNSLANTVNFVILNK             | 1148 - 1169     | 2365.239       | 2366.140     | -45.1         |
| VSEFDYAIQNPEANIIVFDGNNYISSYALR     | 1064 - 1093     | 3421.647       | 3422.184     | -137.3        |
